# Supplementary material for: Tailoring the properties of acetate-based ionic liquids using the tricyanomethanide anion
Source: Royal Society of Chemistry journal article supplement (doi:10.1039/c6cp04651g), 2016-01-01
Supplement: c6cp04651g1.pdf [file c6cp04651g1.pdf]

# **Tailoring the properties of acetate-based ionic liquids using the tricyanomethanide anion**

L.F. Lepre<sup>1,2</sup>, J. Szala-Bilnik<sup>2</sup>, A.A.H. Padua<sup>2</sup>, M. Traïkia<sup>2</sup>, R.A. Ando<sup>1</sup>, M.F. Costa Gomes<sup>2,\*</sup>

## **Supplementary Information**

<sup>1</sup> Laboratório de Espectroscopia Molecular, Instituto de Química, Departamento de Química Fundamental, Universidade de São Paulo, CP 26077, São Paulo 05513-970, Brazil

<sup>2</sup> Institut de Chimie de Clermont-Ferrand, CNRS and Université Blaise Pascal, BP 80026, Aubière Cedex F-63171, France

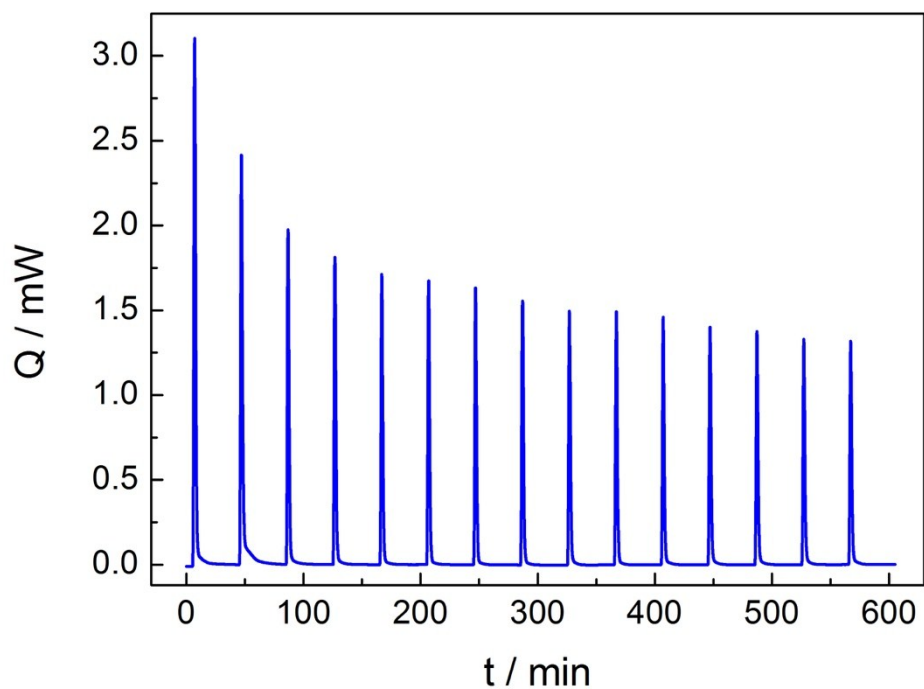

**Figure S1.** Calorimetric signals obtained in an ITC measurement upon mixing  $[\text{C}_4\text{C}_1\text{Im}][\text{OAc}]$  with  $[\text{C}_4\text{C}_1\text{Im}][\text{C}(\text{CN})_3]$ . Each peak correspond to the heat effect involved in  $10\mu\text{L}$  injections of a  $[\text{C}_4\text{C}_1\text{Im}][\text{OAc}]_{(1-x)}[\text{C}(\text{CN})_3]_x$  mixture ( $x_{\text{C}(\text{CN})_3}=0.2400$ ) in pure  $[\text{C}_4\text{C}_1\text{Im}][\text{C}(\text{CN})_3]$  at 318K. During the course of the experiment the sample in the measuring cell was stirred at 90 rpm. Each injection was done during 60 s allowing 40 min interval between consecutive injections.

**Table S1.** Experimental densities of [C<sub>4</sub>C<sub>1</sub>Im][OAc], [C<sub>4</sub>C<sub>1</sub>Im][C(CN)<sub>3</sub>] and their mixtures between 293 K and 353 K at ambient pressure.

| T / K                                                                                             | $\rho$ / g cm <sup>-3</sup> | $\delta$ / % | T / K                                                                                             | $\rho$ / g cm <sup>-3</sup> | $\delta$ / % |
|---------------------------------------------------------------------------------------------------|-----------------------------|--------------|---------------------------------------------------------------------------------------------------|-----------------------------|--------------|
| [C <sub>4</sub> C <sub>1</sub> Im][OAc]                                                           |                             |              | [C <sub>4</sub> C <sub>1</sub> Im][C(CN) <sub>3</sub> ]                                           |                             |              |
| 293.15                                                                                            | 1.054289                    | -0.009       | 293.15                                                                                            | 1.049579                    | -0.015       |
| 298.15                                                                                            | 1.051196                    | -0.003       | 298.15                                                                                            | -                           | -            |
| 303.15                                                                                            | 1.048154                    | 0.000        | 303.15                                                                                            | 1.042796                    | 0.000        |
| 313.15                                                                                            | 1.042046                    | 0.005        | 313.15                                                                                            | 1.036081                    | 0.009        |
| 323.15                                                                                            | 1.035958                    | 0.010        | 323.15                                                                                            | 1.029431                    | 0.012        |
| 333.15                                                                                            | 1.029930                    | 0.008        | 333.15                                                                                            | 1.022843                    | 0.009        |
| 343.15                                                                                            | 1.023966                    | 0.000        | 343.15                                                                                            | 1.016318                    | -0.001       |
| 353.15                                                                                            | 1.018046                    | -0.013       | 353.15                                                                                            | 1.009847                    | -0.016       |
| [C <sub>4</sub> C <sub>1</sub> Im][OAc] <sub>0.7476</sub> [C(CN) <sub>3</sub> ] <sub>0.2524</sub> |                             |              | [C <sub>4</sub> C <sub>1</sub> Im][OAc] <sub>0.4993</sub> [C(CN) <sub>3</sub> ] <sub>0.5007</sub> |                             |              |
| 293.15                                                                                            | 1.052409                    | -0.010       | 293.15                                                                                            | 1.050421                    | -0.012       |
| 298.15                                                                                            | 1.049243                    | -0.003       | 298.15                                                                                            | 1.047158                    | -0.003       |
| 303.15                                                                                            | 1.046097                    | 0.000        | 303.15                                                                                            | 1.043939                    | 0.002        |
| 313.15                                                                                            | 1.039808                    | 0.009        | 313.15                                                                                            | 1.037524                    | 0.010        |
| 323.15                                                                                            | 1.033578                    | 0.011        | 323.15                                                                                            | 1.031167                    | 0.011        |
| 333.15                                                                                            | 1.027410                    | 0.008        | 333.15                                                                                            | 1.024865                    | 0.009        |
| 343.15                                                                                            | 1.021291                    | 0.000        | 343.15                                                                                            | 1.018614                    | 0.000        |
| 353.15                                                                                            | 1.015220                    | -0.013       | 353.15                                                                                            | 1.012410                    | -0.013       |
| [C <sub>4</sub> C <sub>1</sub> Im][OAc] <sub>0.2501</sub> [C(CN) <sub>3</sub> ] <sub>0.7499</sub> |                             |              |                                                                                                   |                             |              |
| 293.15                                                                                            | 1.049400                    | -0.012       |                                                                                                   |                             |              |
| 298.15                                                                                            | 1.042775                    | -0.004       |                                                                                                   |                             |              |
| 303.15                                                                                            | 1.036215                    | 0.001        |                                                                                                   |                             |              |
| 313.15                                                                                            | 1.029712                    | 0.009        |                                                                                                   |                             |              |
| 323.15                                                                                            | 1.023269                    | 0.012        |                                                                                                   |                             |              |
| 333.15                                                                                            | 1.016880                    | 0.008        |                                                                                                   |                             |              |
| 343.15                                                                                            | 1.010542                    | 0.000        |                                                                                                   |                             |              |
| 353.15                                                                                            | 1.046067                    | -0.014       |                                                                                                   |                             |              |

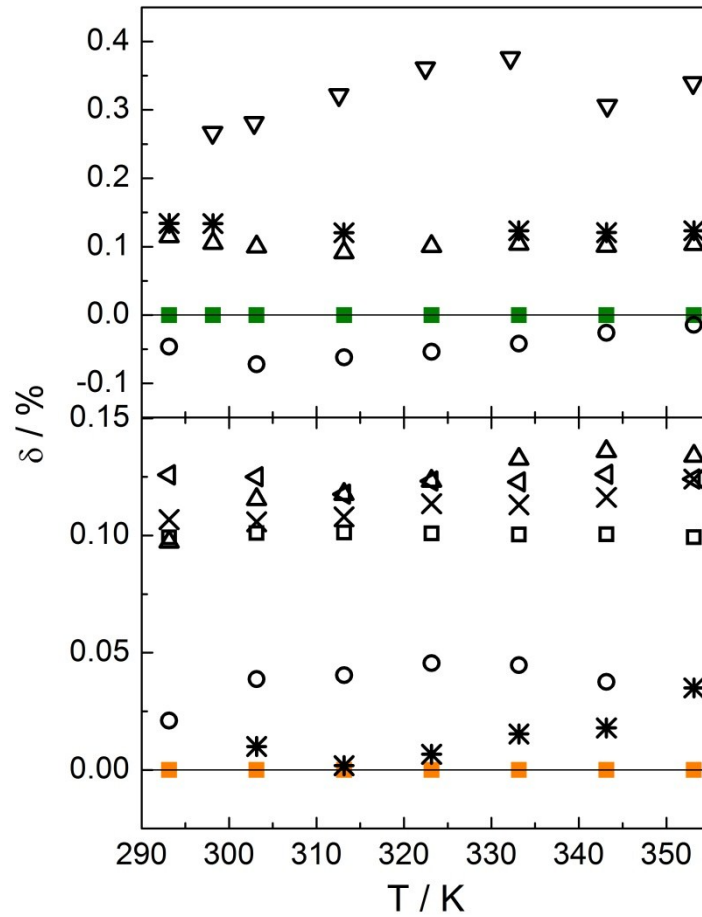

**Figure S2.** Comparison of experimental densities with those reported in the literature. Reported data for  $[\text{C}_4\text{C}_1\text{Im}][\text{OAc}]$  (●, upper plot) were obtained from Stevanovic *et al.* <sup>[1]</sup> (◆), Almeida *et al.* <sup>[2]</sup> (□), Higara *et al.* <sup>[3]</sup> (⊗) and Safarov *et al.* <sup>[4]</sup> (→). For  $[\text{C}_4\text{C}_1\text{Im}][\text{C}(\text{CN})_3]$  (●, lower plot) reported data were obtained from Carvalho *et al.* <sup>[5]</sup> (□), Koller *et al.* <sup>[6]</sup> (●), Zubeir *et al.* <sup>[7]</sup> (→ and ✦ for 0.003 and 0.11  $\text{H}_2\text{O}$  wt%), Lukoshko *et al.* <sup>[8]</sup> (⊗) and Romanos *et al.* <sup>[9]</sup> (⊗).  $\delta = 100 \cdot (\rho_{\text{lit}} - \rho_{\text{exp}}) / \rho_{\text{exp}}$ .

**Table S2.** Excess molar volumes  $V^E$  for  $[\text{C}_4\text{C}_1\text{Im}][\text{OAc}]_{(1-x)}[\text{C}(\text{CN})_3]_x$  mixtures as a function of the composition, expressed in mole fraction of  $[\text{C}_4\text{C}_1\text{Im}][\text{C}(\text{CN})_3]$ ,  $x_{\text{C}(\text{CN})_3}$ , and as a function of temperature.

| $x_{\text{C}(\text{CN})_3}$ | $V^E / \text{cm}^3 \text{mol}^{-1}$ | $x_{\text{C}(\text{CN})_3}$ | $V^E / \text{cm}^3 \text{mol}^{-1}$ | $x_{\text{C}(\text{CN})_3}$ | $V^E / \text{cm}^3 \text{mol}^{-1}$ |
|-----------------------------|-------------------------------------|-----------------------------|-------------------------------------|-----------------------------|-------------------------------------|
| T = 293.15 K                |                                     | T = 303.15 K                |                                     | T = 313.15 K                |                                     |
| 0.0000                      | 0.000                               | 0.0000                      | 0.000                               | 0.0000                      | 0.000                               |
| 0.2524                      | 0.103                               | 0.2524                      | 0.103                               | 0.2524                      | 0.106                               |
| 0.5007                      | 0.258                               | 0.5007                      | 0.261                               | 0.5007                      | 0.260                               |
| 0.7499                      | 0.247                               | 0.7499                      | 0.247                               | 0.7499                      | 0.246                               |
| 1.0000                      | 0.000                               | 1.0000                      | 0.000                               | 1.0000                      | 0.000                               |
| T = 323.15 K                |                                     | T = 333.15 K                |                                     | T = 343.15 K                |                                     |
| 0.0000                      | 0.000                               | 0.0000                      | 0.000                               | 0.0000                      | 0.000                               |
| 0.2524                      | 0.104                               | 0.2524                      | 0.101                               | 0.2524                      | 0.102                               |
| 0.5007                      | 0.256                               | 0.5007                      | 0.254                               | 0.5007                      | 0.253                               |
| 0.7499                      | 0.245                               | 0.7499                      | 0.243                               | 0.7499                      | 0.244                               |
| 1.0000                      | 0.000                               | 1.0000                      | 0.000                               | 1.0000                      | 0.000                               |
| T = 353.15 K                |                                     |                             |                                     |                             |                                     |
| 0.0000                      | 0.000                               |                             |                                     |                             |                                     |
| 0.2524                      | 0.102                               |                             |                                     |                             |                                     |
| 0.5007                      | 0.254                               |                             |                                     |                             |                                     |
| 0.7499                      | 0.245                               |                             |                                     |                             |                                     |
| 1.0000                      | 0.000                               |                             |                                     |                             |                                     |

**Table S3.** Heat effects from ITC experiments with the system  $[C_4C_1Im][OAc](1)$  +  $[C_4C_1Im][C(CN)_3](2)$  at 318K. The subscripts c and d stands for cell (or container) and dispenser (or syringe), respectively.

| $n_{1c} / \text{mol}$ | $n_{2c} / \text{mol}$ | $n_{1d} / \text{mmol}$ | $n_{2d} / \text{mmol}$ | Q / J    |
|-----------------------|-----------------------|------------------------|------------------------|----------|
| 3.6669E-03            | 6.2638E-04            | 0                      | 2.2488E-02             | -0.14267 |
| 3.6669E-03            | 6.4887E-04            | 0                      | 2.2488E-02             | -0.14213 |
| 3.6669E-03            | 6.7136E-04            | 0                      | 2.2488E-02             | -0.14102 |
| 3.6669E-03            | 6.9384E-04            | 0                      | 2.2488E-02             | -0.13908 |
| 3.6669E-03            | 7.1633E-04            | 0                      | 2.2488E-02             | -0.13926 |
| 3.6669E-03            | 7.3882E-04            | 0                      | 2.2488E-02             | -0.13751 |
| 3.6669E-03            | 7.6131E-04            | 0                      | 2.2488E-02             | -0.13667 |
| 3.6669E-03            | 7.8379E-04            | 0                      | 2.2488E-02             | -0.13448 |
| 3.6669E-03            | 8.0628E-04            | 0                      | 2.2488E-02             | -0.13326 |
| 3.6669E-03            | 8.2877E-04            | 0                      | 2.2488E-02             | -0.13459 |
| 3.6669E-03            | 8.5126E-04            | 0                      | 2.2488E-02             | -0.12763 |
| 3.6669E-03            | 8.7374E-04            | 0                      | 2.2488E-02             | -0.12903 |
| 3.6669E-03            | 8.9623E-04            | 0                      | 2.2488E-02             | -0.12681 |
| 3.6669E-03            | 9.1872E-04            | 0                      | 2.2488E-02             | -0.12640 |
| 3.6669E-03            | 9.4121E-04            | 0                      | 2.2488E-02             | -0.12534 |
| 3.6669E-03            | 9.6369E-04            | 0                      | 2.2488E-02             | -0.12416 |
| 3.6669E-03            | 9.8618E-04            | 0                      | 2.2488E-02             | -0.12261 |
| 3.6669E-03            | 1.0087E-03            | 0                      | 2.2488E-02             | -0.12119 |
| 3.6669E-03            | 1.0312E-03            | 0                      | 2.2488E-02             | -0.12381 |
| 3.6669E-03            | 1.0536E-03            | 0                      | 2.2488E-02             | -0.11635 |
| 3.6669E-03            | 1.0761E-03            | 0                      | 2.2488E-02             | -0.11864 |
| 3.6669E-03            | 1.0986E-03            | 0                      | 2.2488E-02             | -0.11634 |
| 3.6669E-03            | 1.1211E-03            | 0                      | 2.2488E-02             | -0.11572 |
| 3.6674E-03            | 6.2638E-04            | 0                      | 2.2488E-02             | -0.14565 |
| 3.6674E-03            | 6.4887E-04            | 0                      | 2.2488E-02             | -0.14329 |
| 3.6674E-03            | 6.7136E-04            | 0                      | 2.2488E-02             | -0.14204 |
| 3.6674E-03            | 6.9384E-04            | 0                      | 2.2488E-02             | -0.14043 |
| 3.6674E-03            | 7.1633E-04            | 0                      | 2.2488E-02             | -0.13873 |
| 3.6674E-03            | 7.3882E-04            | 0                      | 2.2488E-02             | -0.13744 |
| 3.6674E-03            | 7.6131E-04            | 0                      | 2.2488E-02             | -0.13528 |
| 3.6674E-03            | 7.8379E-04            | 0                      | 2.2488E-02             | -0.13318 |
| 3.6674E-03            | 8.0628E-04            | 0                      | 2.2488E-02             | -0.13147 |
| 3.6674E-03            | 8.2877E-04            | 0                      | 2.2488E-02             | -0.13086 |
| 3.6674E-03            | 8.5126E-04            | 0                      | 2.2488E-02             | -0.12985 |
| 3.6674E-03            | 8.7374E-04            | 0                      | 2.2488E-02             | -0.12853 |
| 3.6674E-03            | 8.9623E-04            | 0                      | 2.2488E-02             | -0.12704 |
| 3.6674E-03            | 9.1872E-04            | 0                      | 2.2488E-02             | -0.12518 |
| 3.6674E-03            | 9.4121E-04            | 0                      | 2.2488E-02             | -0.12442 |
| 3.6674E-03            | 9.6369E-04            | 0                      | 2.2488E-02             | -0.12374 |
| 3.6674E-03            | 9.8618E-04            | 0                      | 2.2488E-02             | -0.12184 |
| 3.6674E-03            | 1.0087E-03            | 0                      | 2.2488E-02             | -0.12056 |
| 3.6674E-03            | 1.0312E-03            | 0                      | 2.2488E-02             | -0.11970 |
| 3.6674E-03            | 1.0536E-03            | 0                      | 2.2488E-02             | -0.11857 |
| 3.6674E-03            | 1.0761E-03            | 0                      | 2.2488E-02             | -0.11732 |
| 3.6674E-03            | 1.0986E-03            | 0                      | 2.2488E-02             | -0.11541 |
| 3.6674E-03            | 1.1211E-03            | 0                      | 2.2488E-02             | -0.11481 |
| 3.6674E-03            | 1.1436E-03            | 0                      | 2.2488E-02             | -0.11390 |
| 3.6674E-03            | 1.1661E-03            | 0                      | 2.2488E-02             | -0.11237 |
| 3.6674E-03            | 1.1886E-03            | 0                      | 2.2488E-02             | -0.11135 |

---

|            |            |   |            |          |
|------------|------------|---|------------|----------|
| 3.6674E-03 | 1.2111E-03 | 0 | 2.2488E-02 | -0.11071 |
| 3.6674E-03 | 1.2335E-03 | 0 | 2.2488E-02 | -0.10902 |
| 1.7855E-03 | 1.7848E-03 | 0 | 2.2488E-02 | -0.03940 |
| 1.7855E-03 | 1.8073E-03 | 0 | 2.2488E-02 | -0.03949 |
| 1.7855E-03 | 1.8298E-03 | 0 | 2.2488E-02 | -0.03803 |
| 1.7855E-03 | 1.8523E-03 | 0 | 2.2488E-02 | -0.03812 |
| 1.7855E-03 | 1.8748E-03 | 0 | 2.2488E-02 | -0.03747 |
| 1.7855E-03 | 1.8972E-03 | 0 | 2.2488E-02 | -0.03683 |
| 1.7855E-03 | 1.9197E-03 | 0 | 2.2488E-02 | -0.03616 |
| 1.7855E-03 | 1.9422E-03 | 0 | 2.2488E-02 | -0.03590 |
| 1.7855E-03 | 1.9647E-03 | 0 | 2.2488E-02 | -0.03504 |
| 1.7855E-03 | 1.9872E-03 | 0 | 2.2488E-02 | -0.03425 |
| 1.7855E-03 | 2.0097E-03 | 0 | 2.2488E-02 | -0.03344 |
| 1.7855E-03 | 2.0322E-03 | 0 | 2.2488E-02 | -0.03301 |
| 1.7855E-03 | 2.0547E-03 | 0 | 2.2488E-02 | -0.03274 |
| 1.7855E-03 | 2.0771E-03 | 0 | 2.2488E-02 | -0.03207 |
| 1.7855E-03 | 2.0996E-03 | 0 | 2.2488E-02 | -0.03143 |
| 1.7855E-03 | 2.1221E-03 | 0 | 2.2488E-02 | -0.03093 |
| 1.7855E-03 | 2.1446E-03 | 0 | 2.2488E-02 | -0.03015 |
| 1.7855E-03 | 2.1671E-03 | 0 | 2.2488E-02 | -0.02989 |
| 1.7855E-03 | 2.1896E-03 | 0 | 2.2488E-02 | -0.02948 |
| 1.7855E-03 | 2.2121E-03 | 0 | 2.2488E-02 | -0.02878 |
| 1.7855E-03 | 2.2346E-03 | 0 | 2.2488E-02 | -0.02857 |
| 1.7855E-03 | 2.2570E-03 | 0 | 2.2488E-02 | -0.02814 |
| 1.7855E-03 | 2.2795E-03 | 0 | 2.2488E-02 | -0.02771 |
| 1.7855E-03 | 2.3020E-03 | 0 | 2.2488E-02 | -0.02726 |
| 1.7855E-03 | 2.3245E-03 | 0 | 2.2488E-02 | -0.02681 |
| 1.7855E-03 | 2.3470E-03 | 0 | 2.2488E-02 | -0.02624 |
| 1.7855E-03 | 2.3695E-03 | 0 | 2.2488E-02 | -0.02590 |
| 1.7855E-03 | 2.3920E-03 | 0 | 2.2488E-02 | -0.02557 |
| 1.7855E-03 | 2.4145E-03 | 0 | 2.2488E-02 | -0.02526 |
| 1.7855E-03 | 2.4369E-03 | 0 | 2.2488E-02 | -0.02476 |
| 1.7855E-03 | 2.4594E-03 | 0 | 2.2488E-02 | -0.02451 |
| 1.7855E-03 | 2.4819E-03 | 0 | 2.2488E-02 | -0.02416 |
| 1.7855E-03 | 2.5044E-03 | 0 | 2.2488E-02 | -0.02373 |
| 1.7855E-03 | 2.5269E-03 | 0 | 2.2488E-02 | -0.02345 |
| 1.7855E-03 | 2.5494E-03 | 0 | 2.2488E-02 | -0.02320 |
| 1.7855E-03 | 2.5719E-03 | 0 | 2.2488E-02 | -0.02287 |
| 1.7855E-03 | 2.5944E-03 | 0 | 2.2488E-02 | -0.02254 |
| 1.7855E-03 | 2.6168E-03 | 0 | 2.2488E-02 | -0.02209 |
| 1.7855E-03 | 2.6393E-03 | 0 | 2.2488E-02 | -0.02178 |
| 1.7855E-03 | 2.6618E-03 | 0 | 2.2488E-02 | -0.02160 |
| 1.7855E-03 | 2.6843E-03 | 0 | 2.2488E-02 | -0.02130 |
| 1.7855E-03 | 2.7068E-03 | 0 | 2.2488E-02 | -0.02102 |
| 1.7855E-03 | 2.7293E-03 | 0 | 2.2488E-02 | -0.02073 |
| 1.7855E-03 | 2.7518E-03 | 0 | 2.2488E-02 | -0.02040 |
| 1.7855E-03 | 2.7743E-03 | 0 | 2.2488E-02 | -0.02016 |
| 1.7855E-03 | 2.7967E-03 | 0 | 2.2488E-02 | -0.01996 |
| 1.7855E-03 | 2.8192E-03 | 0 | 2.2488E-02 | -0.01965 |
| 1.7855E-03 | 2.8417E-03 | 0 | 2.2488E-02 | -0.01936 |
| 1.7855E-03 | 2.8642E-03 | 0 | 2.2488E-02 | -0.01905 |
| 1.7855E-03 | 2.8867E-03 | 0 | 2.2488E-02 | -0.01883 |
| 1.7855E-03 | 2.0980E-03 | 0 | 2.2488E-02 | -0.03183 |
| 1.7855E-03 | 2.1205E-03 | 0 | 2.2488E-02 | -0.03165 |
| 1.7855E-03 | 2.1430E-03 | 0 | 2.2488E-02 | -0.03116 |

---

---

|            |            |   |            |          |
|------------|------------|---|------------|----------|
| 1.7855E-03 | 2.1655E-03 | 0 | 2.2488E-02 | -0.03048 |
| 1.7855E-03 | 2.1880E-03 | 0 | 2.2488E-02 | -0.03035 |
| 1.7855E-03 | 2.2104E-03 | 0 | 2.2488E-02 | -0.02953 |
| 1.7855E-03 | 2.2329E-03 | 0 | 2.2488E-02 | -0.02967 |
| 1.7855E-03 | 2.2554E-03 | 0 | 2.2488E-02 | -0.02903 |
| 1.7855E-03 | 2.2779E-03 | 0 | 2.2488E-02 | -0.02772 |
| 1.7855E-03 | 2.3004E-03 | 0 | 2.2488E-02 | -0.02781 |
| 1.7855E-03 | 2.3229E-03 | 0 | 2.2488E-02 | -0.02750 |
| 1.7855E-03 | 2.3454E-03 | 0 | 2.2488E-02 | -0.02728 |
| 1.7855E-03 | 2.3679E-03 | 0 | 2.2488E-02 | -0.02643 |
| 1.7855E-03 | 2.3903E-03 | 0 | 2.2488E-02 | -0.02604 |
| 1.7855E-03 | 2.4128E-03 | 0 | 2.2488E-02 | -0.02544 |
| 1.7855E-03 | 2.4353E-03 | 0 | 2.2488E-02 | -0.02520 |
| 1.7855E-03 | 2.4578E-03 | 0 | 2.2488E-02 | -0.02493 |
| 1.7855E-03 | 2.4803E-03 | 0 | 2.2488E-02 | -0.02469 |
| 1.7855E-03 | 2.5028E-03 | 0 | 2.2488E-02 | -0.02414 |
| 1.7855E-03 | 2.5253E-03 | 0 | 2.2488E-02 | -0.02402 |
| 1.7855E-03 | 2.5478E-03 | 0 | 2.2488E-02 | -0.02373 |
| 1.7855E-03 | 2.5702E-03 | 0 | 2.2488E-02 | -0.02338 |
| 1.7855E-03 | 2.5927E-03 | 0 | 2.2488E-02 | -0.02265 |
| 1.7855E-03 | 2.6152E-03 | 0 | 2.2488E-02 | -0.02258 |
| 1.7855E-03 | 2.6377E-03 | 0 | 2.2488E-02 | -0.02230 |
| 1.7855E-03 | 2.6602E-03 | 0 | 2.2488E-02 | -0.02186 |
| 1.7855E-03 | 2.6827E-03 | 0 | 2.2488E-02 | -0.02130 |
| 1.7855E-03 | 2.7052E-03 | 0 | 2.2488E-02 | -0.02118 |
| 1.7855E-03 | 2.7277E-03 | 0 | 2.2488E-02 | -0.02092 |
| 1.7855E-03 | 2.7501E-03 | 0 | 2.2488E-02 | -0.02070 |
| 1.7855E-03 | 2.7726E-03 | 0 | 2.2488E-02 | -0.02046 |
| 1.7855E-03 | 2.7951E-03 | 0 | 2.2488E-02 | -0.02010 |
| 1.7855E-03 | 2.8176E-03 | 0 | 2.2488E-02 | -0.01984 |
| 1.7855E-03 | 2.8401E-03 | 0 | 2.2488E-02 | -0.01972 |
| 1.7855E-03 | 2.8626E-03 | 0 | 2.2488E-02 | -0.01960 |
| 1.7855E-03 | 2.8851E-03 | 0 | 2.2488E-02 | -0.01903 |
| 1.7855E-03 | 2.9076E-03 | 0 | 2.2488E-02 | -0.01882 |
| 7.0353E-04 | 2.7897E-03 | 0 | 2.2488E-02 | -0.00427 |
| 7.0353E-04 | 2.8122E-03 | 0 | 2.2488E-02 | -0.00442 |
| 7.0353E-04 | 2.8347E-03 | 0 | 2.2488E-02 | -0.00419 |
| 7.0353E-04 | 2.8572E-03 | 0 | 2.2488E-02 | -0.00426 |
| 7.0353E-04 | 2.8797E-03 | 0 | 2.2488E-02 | -0.00403 |
| 7.0353E-04 | 2.9021E-03 | 0 | 2.2488E-02 | -0.00405 |
| 7.0353E-04 | 2.9246E-03 | 0 | 2.2488E-02 | -0.00426 |
| 7.0353E-04 | 2.9471E-03 | 0 | 2.2488E-02 | -0.00413 |
| 7.0353E-04 | 2.9696E-03 | 0 | 2.2488E-02 | -0.00395 |
| 7.0353E-04 | 2.9921E-03 | 0 | 2.2488E-02 | -0.00391 |
| 7.0353E-04 | 3.0146E-03 | 0 | 2.2488E-02 | -0.00389 |
| 7.0353E-04 | 3.0371E-03 | 0 | 2.2488E-02 | -0.00383 |
| 7.0353E-04 | 3.0596E-03 | 0 | 2.2488E-02 | -0.00375 |
| 7.0353E-04 | 3.0820E-03 | 0 | 2.2488E-02 | -0.00364 |
| 7.0353E-04 | 3.1045E-03 | 0 | 2.2488E-02 | -0.00369 |
| 7.0353E-04 | 3.1270E-03 | 0 | 2.2488E-02 | -0.00360 |
| 7.0353E-04 | 3.1495E-03 | 0 | 2.2488E-02 | -0.00353 |
| 7.0353E-04 | 3.1720E-03 | 0 | 2.2488E-02 | -0.00350 |
| 7.0353E-04 | 3.1945E-03 | 0 | 2.2488E-02 | -0.00363 |
| 7.0353E-04 | 3.2170E-03 | 0 | 2.2488E-02 | -0.00344 |
| 7.0353E-04 | 3.2395E-03 | 0 | 2.2488E-02 | -0.00344 |

---



---

|            |            |            |            |          |
|------------|------------|------------|------------|----------|
| 7.0353E-04 | 3.2619E-03 | 0          | 2.2488E-02 | -0.00340 |
| 7.0353E-04 | 3.2844E-03 | 0          | 2.2488E-02 | -0.00341 |
| 7.0353E-04 | 3.3069E-03 | 0          | 2.2488E-02 | -0.00337 |
| 7.0353E-04 | 3.3294E-03 | 0          | 2.2488E-02 | -0.00334 |
| 7.0353E-04 | 3.3519E-03 | 0          | 2.2488E-02 | -0.00332 |
| 7.0353E-04 | 3.3744E-03 | 0          | 2.2488E-02 | -0.00334 |
| 7.0353E-04 | 3.3969E-03 | 0          | 2.2488E-02 | -0.00326 |
| 7.0353E-04 | 3.4194E-03 | 0          | 2.2488E-02 | -0.00327 |
| 7.0353E-04 | 3.4418E-03 | 0          | 2.2488E-02 | -0.00323 |
| 7.0353E-04 | 3.4643E-03 | 0          | 2.2488E-02 | -0.00328 |
| 7.0353E-04 | 3.4868E-03 | 0          | 2.2488E-02 | -0.00330 |
| 7.0353E-04 | 3.5093E-03 | 0          | 2.2488E-02 | -0.00328 |
| 7.0353E-04 | 3.5318E-03 | 0          | 2.2488E-02 | -0.00328 |
| 7.0353E-04 | 3.5543E-03 | 0          | 2.2488E-02 | -0.00327 |
| 7.0353E-04 | 3.5768E-03 | 0          | 2.2488E-02 | -0.00327 |
| 7.0353E-04 | 3.5993E-03 | 0          | 2.2488E-02 | -0.00318 |
| 7.0353E-04 | 3.6217E-03 | 0          | 2.2488E-02 | -0.00321 |
| 7.0353E-04 | 3.6442E-03 | 0          | 2.2488E-02 | -0.00313 |
| 7.0353E-04 | 3.6667E-03 | 0          | 2.2488E-02 | -0.00315 |
| 7.0353E-04 | 3.6892E-03 | 0          | 2.2488E-02 | -0.00306 |
| 7.0353E-04 | 3.7117E-03 | 0          | 2.2488E-02 | -0.00308 |
| 7.0353E-04 | 3.7342E-03 | 0          | 2.2488E-02 | -0.00307 |
| 7.0353E-04 | 3.7567E-03 | 0          | 2.2488E-02 | -0.00300 |
| 7.0353E-04 | 3.7792E-03 | 0          | 2.2488E-02 | -0.00297 |
| 7.0353E-04 | 3.8016E-03 | 0          | 2.2488E-02 | -0.00299 |
| 7.0353E-04 | 3.8241E-03 | 0          | 2.2488E-02 | -0.00297 |
| 7.0353E-04 | 3.8466E-03 | 0          | 2.2488E-02 | -0.00289 |
| 7.0353E-04 | 3.8691E-03 | 0          | 2.2488E-02 | -0.00288 |
| 7.0353E-04 | 3.8916E-03 | 0          | 2.2488E-02 | -0.00285 |
| 1.5326E-04 | 3.6422E-03 | 3.8314E-02 | 1.2099E-02 | -0.20257 |
| 1.9157E-04 | 3.6543E-03 | 3.8314E-02 | 1.2099E-02 | -0.19045 |
| 2.2989E-04 | 3.6664E-03 | 3.8314E-02 | 1.2099E-02 | -0.18335 |
| 2.6820E-04 | 3.6785E-03 | 3.8314E-02 | 1.2099E-02 | -0.17756 |
| 3.0652E-04 | 3.6906E-03 | 3.8314E-02 | 1.2099E-02 | -0.17318 |
| 3.4483E-04 | 3.7027E-03 | 3.8314E-02 | 1.2099E-02 | -0.16820 |
| 3.8314E-04 | 3.7148E-03 | 3.8314E-02 | 1.2099E-02 | -0.16328 |
| 4.2146E-04 | 3.7269E-03 | 3.8314E-02 | 1.2099E-02 | -0.15954 |
| 4.5977E-04 | 3.7390E-03 | 3.8314E-02 | 1.2099E-02 | -0.15885 |
| 4.9809E-04 | 3.7511E-03 | 3.8314E-02 | 1.2099E-02 | -0.15922 |
| 5.3640E-04 | 3.7632E-03 | 3.8314E-02 | 1.2099E-02 | -0.15704 |
| 5.7471E-04 | 3.7753E-03 | 3.8314E-02 | 1.2099E-02 | -0.15287 |
| 1.5326E-04 | 3.6270E-03 | 3.8314E-02 | 1.2099E-02 | -0.19268 |
| 1.9157E-04 | 3.6391E-03 | 3.8314E-02 | 1.2099E-02 | -0.18105 |
| 2.2989E-04 | 3.6512E-03 | 3.8314E-02 | 1.2099E-02 | -0.17260 |
| 2.6820E-04 | 3.6633E-03 | 3.8314E-02 | 1.2099E-02 | -0.16824 |
| 3.0652E-04 | 3.6754E-03 | 3.8314E-02 | 1.2099E-02 | -0.16581 |
| 3.4483E-04 | 3.6875E-03 | 3.8314E-02 | 1.2099E-02 | -0.16194 |
| 3.8314E-04 | 3.6996E-03 | 3.8314E-02 | 1.2099E-02 | -0.15895 |
| 4.2146E-04 | 3.7117E-03 | 3.8314E-02 | 1.2099E-02 | -0.15650 |
| 4.5977E-04 | 3.7238E-03 | 3.8314E-02 | 1.2099E-02 | -0.15615 |
| 4.9809E-04 | 3.7359E-03 | 3.8314E-02 | 1.2099E-02 | -0.15496 |
| 5.3640E-04 | 3.7480E-03 | 3.8314E-02 | 1.2099E-02 | -0.15179 |
| 5.7471E-04 | 3.7601E-03 | 3.8314E-02 | 1.2099E-02 | -0.14760 |
| 1.5326E-04 | 3.6318E-03 | 3.8314E-02 | 1.2099E-02 | -0.19720 |
| 1.9157E-04 | 3.6439E-03 | 3.8314E-02 | 1.2099E-02 | -0.18670 |

---

---

|            |            |            |            |          |
|------------|------------|------------|------------|----------|
| 2.2989E-04 | 3.6560E-03 | 3.8314E-02 | 1.2099E-02 | -0.18030 |
| 2.6820E-04 | 3.6681E-03 | 3.8314E-02 | 1.2099E-02 | -0.17414 |
| 3.0652E-04 | 3.6802E-03 | 3.8314E-02 | 1.2099E-02 | -0.16959 |
| 3.4483E-04 | 3.6923E-03 | 3.8314E-02 | 1.2099E-02 | -0.16575 |
| 3.8314E-04 | 3.7044E-03 | 3.8314E-02 | 1.2099E-02 | -0.16381 |
| 4.2146E-04 | 3.7165E-03 | 3.8314E-02 | 1.2099E-02 | -0.16356 |
| 4.5977E-04 | 3.7286E-03 | 3.8314E-02 | 1.2099E-02 | -0.16022 |
| 4.9809E-04 | 3.7407E-03 | 3.8314E-02 | 1.2099E-02 | -0.15899 |
| 5.3640E-04 | 3.7528E-03 | 3.8314E-02 | 1.2099E-02 | -0.15238 |
| 5.7471E-04 | 3.7649E-03 | 3.8314E-02 | 1.2099E-02 | -0.15203 |

---

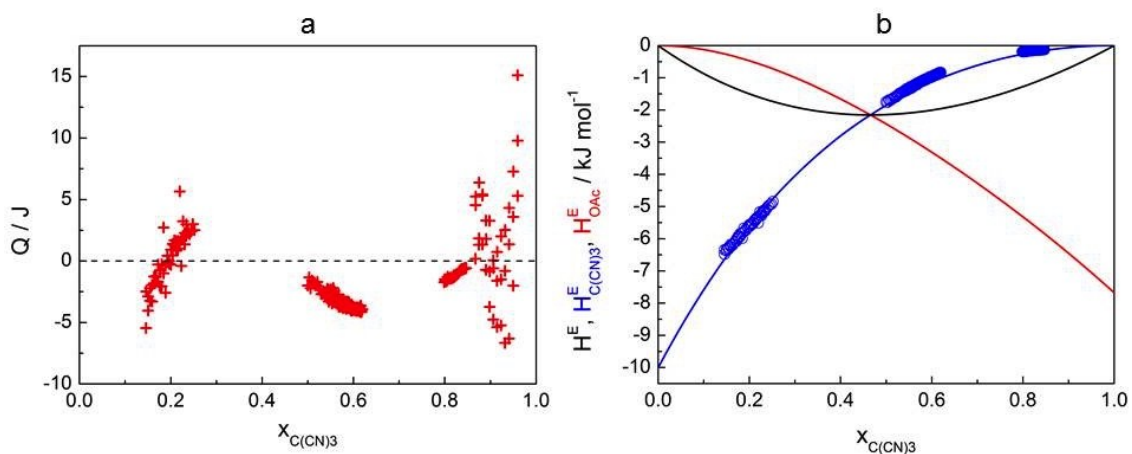

**Figure S3.** (a) Absolute deviation of experimental ITC data from the adjusted Redlich-Kister curve and (b) partial excess enthalpy for both ILs ( $H_{OAc}^E$  and  $H_{C(CN)3}^E$  for  $[C_4C_1Im][OAc]$  and  $[C_4C_1Im][C(CN)_3]$ , respectively) together with excess enthalpy of the mixture ( $H^E$ ) after ITC data treatment.

**Table S4.** Parameters obtained from fitting experimental data of partial excess enthalpies upon mixing [C<sub>4</sub>C<sub>1</sub>Im][An1] with [C<sub>4</sub>C<sub>1</sub>Im][An2] to form the mixture [C<sub>4</sub>C<sub>1</sub>Im][An1]<sub>(1-x)</sub>[An2]<sub>x</sub>. The parameters A<sub>i</sub> are in kJ mol<sup>-1</sup> and the partial molar excess enthalpies at infinite dilution ( $\overline{H}_{IL}^{E,\infty}$  / kJ mol<sup>-1</sup>) for IL1 and IL2.

| [C <sub>4</sub> C <sub>1</sub> Im][An1] <sub>(1-x)</sub> [An2] <sub>x</sub>                             | A <sub>0</sub> | A <sub>1</sub> | A <sub>2</sub> | $\overline{H}_{IL1}^{E,\infty}$ | $\overline{H}_{IL2}^{E,\infty}$ |
|---------------------------------------------------------------------------------------------------------|----------------|----------------|----------------|---------------------------------|---------------------------------|
| [C <sub>4</sub> C <sub>1</sub> Im][OAc] <sub>(1-x)</sub> [CCN] <sub>3</sub> <sub>x</sub>                | -8.580         | -1.168         | -0.265         | -7.677                          | -10.012                         |
| [C <sub>4</sub> C <sub>1</sub> Im][NTf <sub>2</sub> ] <sub>(1-x)</sub> [PF <sub>6</sub> ] <sub>x</sub>  | 1.656          | -0.211         | 0.088          | 1.955                           | 1.533                           |
| [C <sub>4</sub> C <sub>1</sub> Im][BF <sub>4</sub> ] <sub>(1-x)</sub> [PF <sub>6</sub> ] <sub>x</sub>   | -0.486         | 0.120          | 0.271          | -0.335                          | -0.095                          |
| [C <sub>4</sub> C <sub>1</sub> Im][MeSO <sub>4</sub> ] <sub>(1-x)</sub> [BF <sub>4</sub> ] <sub>x</sub> | -1.425         | 0.085          | 0.577          | -0.933                          | -0.763                          |

**Table S5.** Experimental viscosities ( $\eta$ ) of  $[\text{C}_4\text{C}_1\text{Im}][\text{OAc}]_{(1-x)}[\text{C}(\text{CN})_3]_x$  mixtures as a function of the composition, expressed in mole fraction of  $[\text{C}_4\text{C}_1\text{Im}][\text{C}(\text{CN})_3]$ ,  $x_{\text{C}(\text{CN})_3}$ , and as a function of temperature.

| $[\text{C}_4\text{C}_1\text{Im}][\text{OAc}]_{(1-x)}[\text{C}_4\text{C}_1\text{Im}][\text{C}(\text{CN})_3]_x$ |                |                             |                |                             |                |
|---------------------------------------------------------------------------------------------------------------|----------------|-----------------------------|----------------|-----------------------------|----------------|
| $x_{\text{C}(\text{CN})_3}$                                                                                   | $\eta$ / mPa.s | $x_{\text{C}(\text{CN})_3}$ | $\eta$ / mPa.s | $x_{\text{C}(\text{CN})_3}$ | $\eta$ / mPa.s |
| T = 293.15 K                                                                                                  |                | T = 298.15 K                |                | T = 303.15 K                |                |
| 0.0000                                                                                                        | 551.01         | 0.0000                      | 370.9          | 0.0000                      | 255.37         |
| 0.2524                                                                                                        | 249.29         | 0.2524                      | 174.13         | 0.2524                      | 125.49         |
| 0.5007                                                                                                        | 111.43         | 0.5007                      | 81.864         | 0.5007                      | 62.111         |
| 0.7499                                                                                                        | 55.097         | 0.7499                      | 42.515         | 0.7499                      | 33.895         |
| 1.0000                                                                                                        | 32.977         | 1.0000                      |                | 1.0000                      | 21.767         |
| T = 313.15 K                                                                                                  |                | T = 323.15 K                |                | T = 333.15 K                |                |
| 0.0000                                                                                                        | 133.77         | 0.0000                      | 77.166         | 0.0000                      | 48.416         |
| 0.2524                                                                                                        | 70.732         | 0.2524                      | 43.743         | 0.2524                      | 28.976         |
| 0.5007                                                                                                        | 38.197         | 0.5007                      | 25.349         | 0.5007                      | 18.11          |
| 0.7499                                                                                                        | 22.605         | 0.7499                      | 16.423         | 0.7499                      | 12.165         |
| 1.0000                                                                                                        | 15.67          | 1.0000                      | 11.657         | 1.0000                      | 9.0056         |
| T = 343.15 K                                                                                                  |                | T = 353.15 K                |                |                             |                |
| 0.0000                                                                                                        | 32.291         | 0.0000                      | 22.704         |                             |                |
| 0.2524                                                                                                        | 20.317         | 0.2524                      | 15.167         |                             |                |
| 0.5007                                                                                                        | 13.425         | 0.5007                      | 10.266         |                             |                |
| 0.7499                                                                                                        | 9.3253         | 0.7499                      | 7.3853         |                             |                |
| 1.0000                                                                                                        | 6.7708         | 1.0000                      | 5.5259         |                             |                |

**Table S6.** Correlation parameters of the VFT equation (A, k and T<sub>0</sub>) with the average absolute deviation of the fit (AAD) for the viscosity of the ILs mixtures.

| IL                                                                                            | A /10 <sup>-3</sup> mPa.s.K <sup>-1/2</sup> | k / K   | T <sub>0</sub> / K | AAD /% |
|-----------------------------------------------------------------------------------------------|---------------------------------------------|---------|--------------------|--------|
| [C <sub>4</sub> C <sub>1</sub> Im][OAc]                                                       | 2.99                                        | 1006.92 | 184.7              | -0.51  |
| [C <sub>4</sub> C <sub>1</sub> Im][OAc] <sub>0.75</sub> [C(CN) <sub>3</sub> ] <sub>0.25</sub> | 6.00                                        | 785.42  | 192.4              | -0.12  |
| [C <sub>4</sub> C <sub>1</sub> Im][OAc] <sub>0.50</sub> [C(CN) <sub>3</sub> ] <sub>0.50</sub> | 9.71                                        | 637.58  | 195.2              | -0.03  |
| [C <sub>4</sub> C <sub>1</sub> Im][OAc] <sub>0.25</sub> [C(CN) <sub>3</sub> ] <sub>0.75</sub> | 1.17                                        | 573.10  | 191.1              | 0.20   |
| [C <sub>4</sub> C <sub>1</sub> Im][C(CN) <sub>3</sub> ]                                       | 4.86                                        | 795.75  | 160.1              | 0.13   |

**Table S7.** Deviations of viscosity from the linear average ( $\Delta\eta = \eta_{mix} - \sum_{i=1}^n x_i\eta_i$ ) of  $[C_4C_1Im][OAc]_{(1-x)}[C(CN)_3]_x$  mixtures as a function of the composition, expressed in mole fraction of  $[C_4C_1Im][C(CN)_3]$ ,  $x_{C(CN)_3}$ , and as a function of temperature.

| $[C_4C_1Im][OAc]_{(1-x)}[C(CN)_3]_x$ |                                        |               |                                        |               |                                        |
|--------------------------------------|----------------------------------------|---------------|----------------------------------------|---------------|----------------------------------------|
| $x_{C(CN)_3}$                        | $\Delta\eta / \text{mPa}\cdot\text{s}$ | $x_{C(CN)_3}$ | $\Delta\eta / \text{mPa}\cdot\text{s}$ | $x_{C(CN)_3}$ | $\Delta\eta / \text{mPa}\cdot\text{s}$ |
| T = 293.15 K                         |                                        | T = 303.15 K  |                                        | T = 313.15 K  |                                        |
| 0.0000                               | 0.0                                    | 0.0000        | 0.0                                    | 0.0000        | 0.0                                    |
| 0.2524                               | -171.0                                 | 0.2524        | -70.9                                  | 0.2524        | -33.2                                  |
| 0.5007                               | -180.2                                 | 0.5007        | -76.3                                  | 0.5007        | -36.4                                  |
| 0.7499                               | -107.4                                 | 0.7499        | -46.3                                  | 0.7499        | -22.6                                  |
| 1.0000                               | 0.0                                    | 1.0000        | 0.0                                    | 1.0000        | 0.0                                    |
| T = 323.15 K                         |                                        | T = 333.15 K  |                                        | T = 343.15 K  |                                        |
| 0.0000                               | 0.0                                    | 0.0000        | 0.0                                    | 0.0000        | 0.0                                    |
| 0.2524                               | -16.9                                  | 0.2524        | -9.5                                   | 0.2524        | -5.5                                   |
| 0.5007                               | -19.0                                  | 0.5007        | -10.6                                  | 0.5007        | -6.1                                   |
| 0.7499                               | -11.6                                  | 0.7499        | -6.7                                   | 0.7499        | -3.8                                   |
| 1.0000                               | 0.0                                    | 1.0000        | 0.0                                    | 1.0000        | 0.0                                    |
| T = 353.15 K                         |                                        |               |                                        |               |                                        |
| 0.0000                               | 0.0                                    |               |                                        |               |                                        |
| 0.2524                               | -3.2                                   |               |                                        |               |                                        |
| 0.5007                               | -3.8                                   |               |                                        |               |                                        |
| 0.7499                               | -2.4                                   |               |                                        |               |                                        |
| 1.0000                               | 0.0                                    |               |                                        |               |                                        |

**Table S8.** Experimental self-diffusion coefficients of  $C_4C_1Im^+$ ,  $OAc^-$  and  $C(CN)_3^-$  in  $[C_4C_1Im][OAc]_{(1-x)}[C(CN)_3]_x$  mixtures at 323 K as a function of anion composition.

| $x_{C(CN)_3}$ | $D / 10^{-11} \text{ m}^2 \text{ s}^{-1}$ |         |             |
|---------------|-------------------------------------------|---------|-------------|
|               | $C_4C_1Im^+$                              | $OAc^-$ | $C(CN)_3^-$ |
| 0.00          | 2.00                                      | 2.02    | ---         |
| 0.25          | 3.68                                      | 3.37    | 4.76        |
| 0.50          | 5.97                                      | 5.31    | 7.19        |
| 0.75          | 9.31                                      | 7.33    | 10.7        |
| 1.00          | 13.4                                      | ---     | 14.3        |



**Table S9.** Experimental ionic conductivity of  $[\text{C}_4\text{C}_1\text{Im}][\text{OAc}]$ ,  $[\text{C}_4\text{C}_1\text{Im}][\text{C}(\text{CN})_3]$  and their mixtures at 298 K as a function of composition.

| $X_{\text{C}(\text{CN})_3}$ | $\kappa / \text{mS cm}^{-1}$ |
|-----------------------------|------------------------------|
| 0.0000                      | 0.83                         |
| 0.2524                      | 1.41                         |
| 0.5007                      | 2.88                         |
| 0.7499                      | 6.13                         |
| 1.0000                      | 11.23                        |

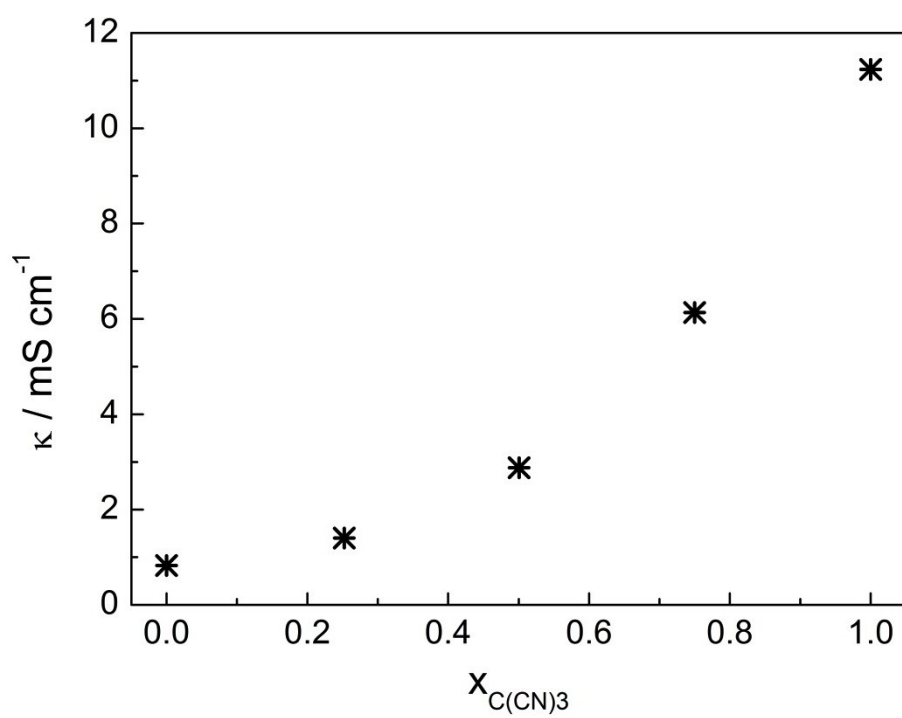

**Figure S4.** Ionic conductivity  $[\text{C}_4\text{C}_1\text{Im}][\text{OAc}]_{(1-x)}[\text{C(CN)}_3]_x$  mixtures as a function of  $\text{C(CN)}_3^-$  at 298.15 K.

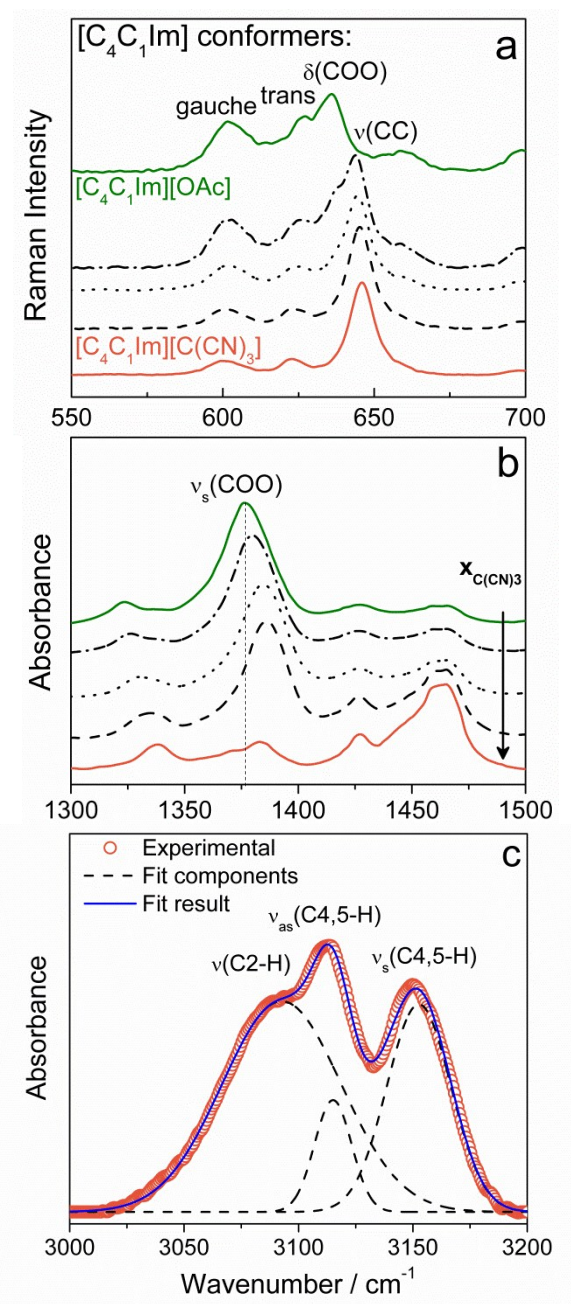

**Figure S5.** (a) Raman spectra of the pure  $[C_4C_1Im][OAc]$  (green line), pure  $[C_4C_1Im][C(CN)_3]$  (orange line) and their mixtures in the region of *gauche* and *trans* conformers of  $C_4C_1Im^+$  cation. Infrared spectra of (b) pure ILs and their mixtures in the range of COO symmetric stretching,  $\nu_s(COO)$ , and (c)  $[C_4C_1Im][C(CN)_3]$  in the region of C-H bands of the imidazolium ring.

**Table S10.**  $^1\text{H}$  chemical shifts observed for  $[\text{C}_4\text{C}_1\text{Im}][\text{OAc}]_{(1-x)}[\text{C}(\text{CN})_3]_x$  mixtures at 298 K as a function of anion composition.

| $x_{\text{C}(\text{CN})_3}$ | $\delta / \text{ppm}$ |       |       |
|-----------------------------|-----------------------|-------|-------|
|                             | H(C2)                 | H(C4) | H(C5) |
| 0.0000                      | 10.42                 | 8.08  | 8.23  |
| 0.2512                      | 9.99                  | 7.56  | 7.66  |
| 0.5007                      | 9.67                  | 7.32  | 7.37  |
| 0.7499                      | 9.27                  | 7.35  | 7.39  |
| 1.0000                      | 8.45                  | 7.2   | 7.26  |

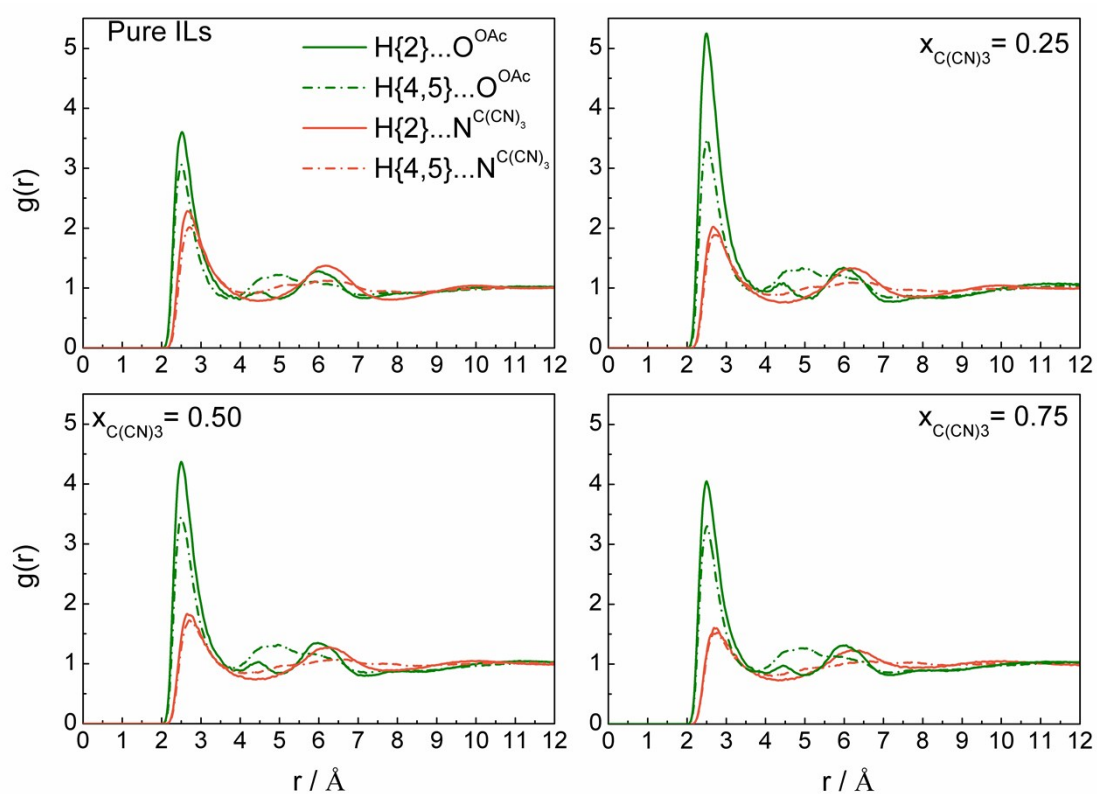

**Figure S6.** Site-site radial pair distribution functions,  $g(r)$ , of  $[\text{C}_4\text{C}_1\text{Im}][\text{OAc}]_{(1-x)}[\text{C}(\text{CN})_3]_x$  mixtures. H{2} and H{4,5} correspond to the hydrogen bond donors positioned in C2, C4 and C5 of the imidazolium ring, respectively. O and N correspond to the hydrogen bond acceptors (oxygen and nitrogen atoms) in the  $\text{OAc}^-$  and  $\text{C}(\text{CN})_3^-$  anions, respectively.

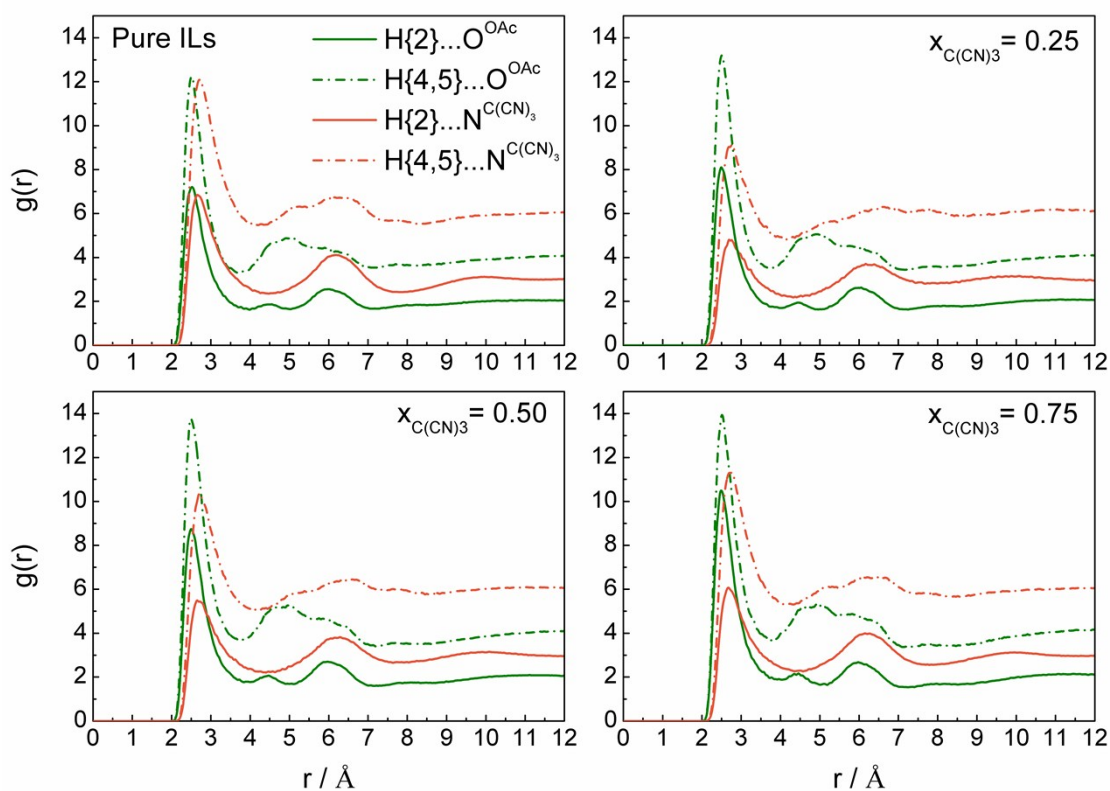

**Figure S7.** Un-normalized site-site radial distribution functions of  $[\text{C}_4\text{C}_1\text{Im}][\text{OAc}]_{(1-x)}[\text{C}(\text{CN})_3]_x$  mixtures with respect to the number of possible H-bonds between donor H atoms on the imidazolium cation and acceptor O or N atoms in the two anions (e.g., two possible H-bonds can occur between the  $\text{H}_2$  and the two O atoms from acetate, but four possible H-bonds can occur between  $\text{H}_{4,5}$  and O). This allows comparison of the height of the first peaks corresponding to the probability of different H-bonds.

**Table S11.** Total ( $E_{\text{TOT}}$ ), Coulomb ( $E_{\text{Coul}}$ ) and Van der Waals ( $E_{\text{VDW}}$ ) energies, volume of the box ( $V$ ),  $pV$  term, enthalpy ( $H$ ) and calculated enthalpy ( $H_{\text{calc}}$ ) of the system, and enthalpy of mixing ( $\Delta_{\text{mix}}H$ ).

| $X_{\text{C}(\text{CN})_3}$                 | 1.00            | 0.75            | 0.50             | 0.25             | 0.00             |
|---------------------------------------------|-----------------|-----------------|------------------|------------------|------------------|
| $E_{\text{TOT}} / \text{kJ mol}^{-1}$       | $-81.8 \pm 2.8$ | $-93.4 \pm 2.8$ | $-104.5 \pm 2.8$ | $-115.7 \pm 2.7$ | $-126.1 \pm 2.8$ |
| $E_{\text{Coul}} / \text{kJ mol}^{-1}$      | -207.2          | -216.6          | -225.5           | -234.2           | -242.4           |
| $E_{\text{VDW}} / \text{kJ mol}^{-1}$       | -84.9           | -84.5           | -84.1            | -83.7            | -83.3            |
| $V / \text{\AA}^3$ (100 ion pairs)          | 38730.5         | 37237.7         | 35761.8          | 34278.0          | 32881.0          |
| $pV / \text{kJ mol}^{-1}$                   | 2.3             | 2.3             | 2.1              | 2.1              | 2.0              |
| $H / \text{kJ mol}^{-1}$                    | $-79.4 \pm 2.8$ | $-91.2 \pm 2.9$ | $-102.3 \pm 2.8$ | $-113.6 \pm 2.7$ | $-124.1 \pm 2.8$ |
| $H_{\text{calc}} / \text{kJ mol}^{-1}$      |                 | $-90.6 \pm 2.8$ | $-101.8 \pm 2.8$ | $-112.9 \pm 2.8$ |                  |
| $\Delta_{\text{mix}}H / \text{kJ mol}^{-1}$ |                 | -0.6            | -0.6             | -0.7             |                  |

## References

- [1] S. Stevanovic, A. Podgorsek, A. A. H. Padua, M. F. C. Gomes, *Journal of Physical Chemistry B* **2012**, *116*, 14416-14425.
- [2] H. F. D. Almeida, H. Passos, J. A. Lopes-da-Silva, A. M. Fernandes, M. G. Freire, J. A. P. Coutinho, *J. Chem. Eng. Data* **2012**, *57*, 3005-3013.
- [3] Y. Hiraga, A. Kato, Y. Sato, R. L. Smith, Jr., *J. Chem. Eng. Data* **2015**, *60*, 876-885.
- [4] J. Safarov, M. Geppert-Rybczynska, I. Kul, E. Hassel, *Fluid Phase Equilibria* **2014**, *383*, 144-155.
- [5] P. J. Carvalho, T. Regueira, L. M. N. B. F. Santos, J. Fernandez, J. A. P. Coutinho, *Journal of Chemical and Engineering Data* **2010**, *55*, 645-652.
- [6] T. M. Koller, S. R. Schmid, S. J. Sachnov, M. H. Rausch, P. Wasserscheid, A. P. Froeba, *International Journal of Thermophysics* **2014**, *35*, 195-217.
- [7] L. F. Zubeir, G. E. Romanos, W. M. A. Weggemans, B. Iliev, T. J. S. Schubert, M. C. Kroon, *Journal of Chemical and Engineering Data* **2015**, *60*, 1544-1562.
- [8] E. Lukoshko, F. Mutelet, U. Domanska, *Journal of Chemical Thermodynamics* **2015**, *85*, 49-56.
- [9] G. E. Romanos, L. F. Zubeir, V. Likodimos, P. Falaras, M. C. Kroon, B. liev, G. Adamova, T. J. S. Schubert, *Journal of Physical Chemistry B* **2013**, *117*, 12234-12251.
